# Supplementary material for: The mechanism of RNA duplex recognition and unwinding by DEAD-box helicase DDX3X
Source: PubMed Central journal article supplement (PMC6626043; doi:10.1038/s41467-019-11083-2), 2019-07-12
Supplement: 41467_2019_11083_MOESM1_ESM.pdf [file 41467_2019_11083_MOESM1_ESM.pdf]

*Supplementary Information*

**The mechanism of RNA duplex recognition and unwinding by  
DEAD-box helicase DDX3X**

He Song and Xinhua Ji



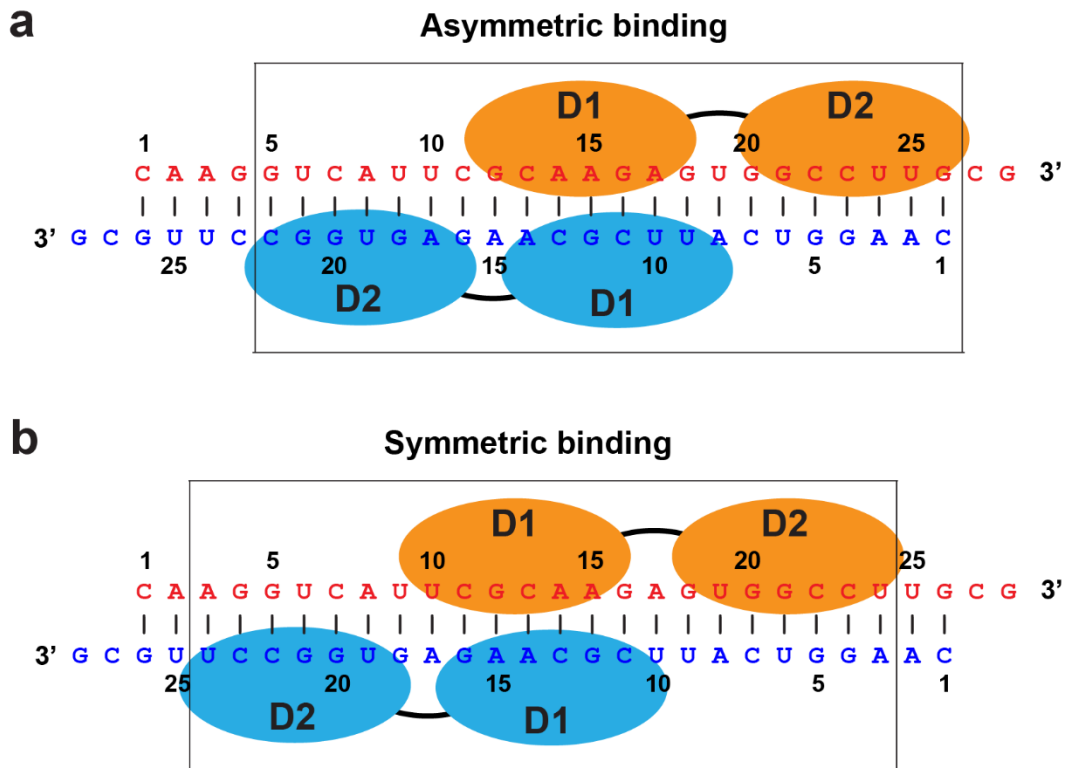

**Supplementary Figure 2 | RNA duplex recognition by human DDX3X.** **a**, Asymmetric binding of dsRNA by the D1D2 core of human DDX3X as observed in the D1D2:dsRNA:D1D2 structure. The D1D2 core contains amino acid residues 132-607 of human DDX3X (Fig. 1a) and the RNA contains 26 base pairs with a 2-nucleotide 3' overhang at both terminal ends. The asymmetric binding results in different sequences for the two bound RNA strands. **b**, Symmetric binding of the dsRNA by the two D1D2 cores as imagined would result in the same sequence for the two bound RNA strands.

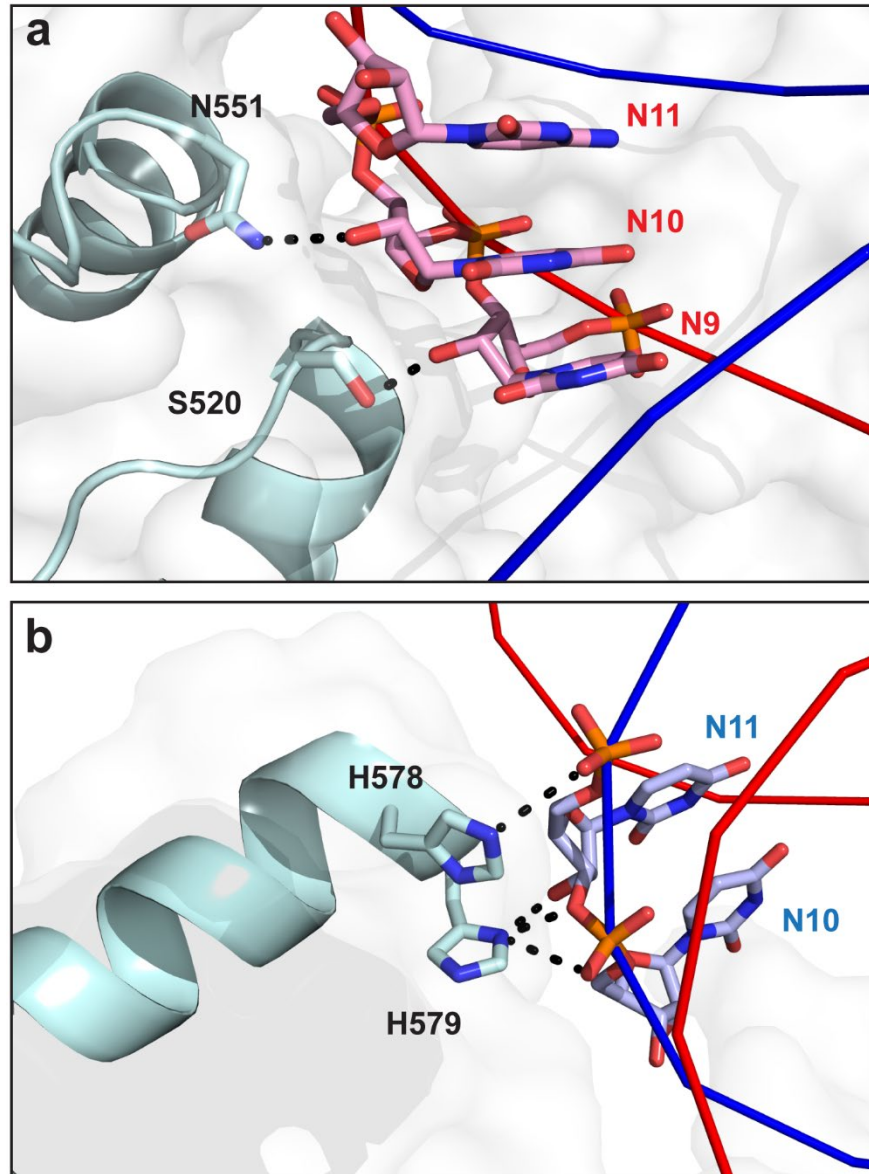

**Supplementary Figure 3 | Detailed interactions between the CTE of human DDX3X and dsRNA.**  
**a**, S520 and N551 of CTE recognize the 2'-hydroxyl groups of nucleotide residues 9 and 10 in the central region of RNA Strand 2 (backbone in red). **b**, H578 and H579 of CTE recognize the nucleotide residues 10 and 11 in the central region of RNA Strand 1 (backbone in blue).

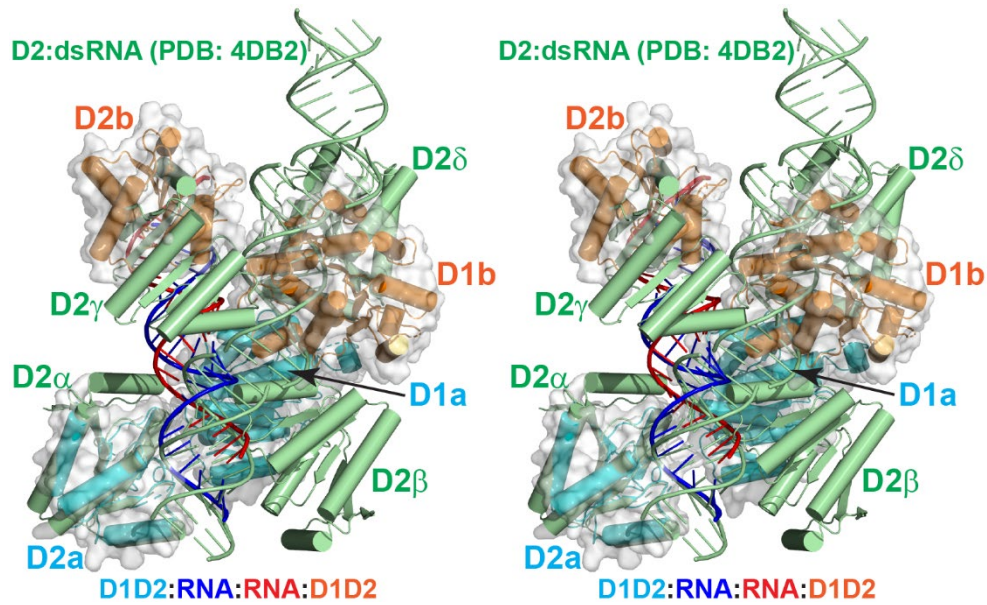

**Supplementary Figure 4 | The DDX3X D1D2:dsRNA:D1D2 assembly vs the asymmetric unit content of the Mss116p D2:dsRNA structure in stereo.** The D1D2:dsRNA:D1D2 assembly of DDX3X (this work), which is revealed in crystal, also observed in solution, and validated by Hill kinetics data, is illustrated as a cartoon model in cyan for D1D2<sup>MolA</sup>, orange for D1D2<sup>MolB</sup>, blue for RNA Strand 1, and red for RNA Strand 2. The two D1D2 cores are also outlined with transparent molecular surfaces. The asymmetric unit of the Mss116p D2:dsRNA structure, containing four D2s (D2α through δ) and a pseudo-continuous RNA duplex (the D2:D2:pseudo-dsRNA:D2:D2 ensemble, PDB: 4DB2) is shown as a cartoon model in palegreen. The two structures are superpositions on the bases of D2a in the D1D2:dsRNA:D1D2 assembly and D2α in the D2:D2:dsRNA:D2:D2 ensemble.

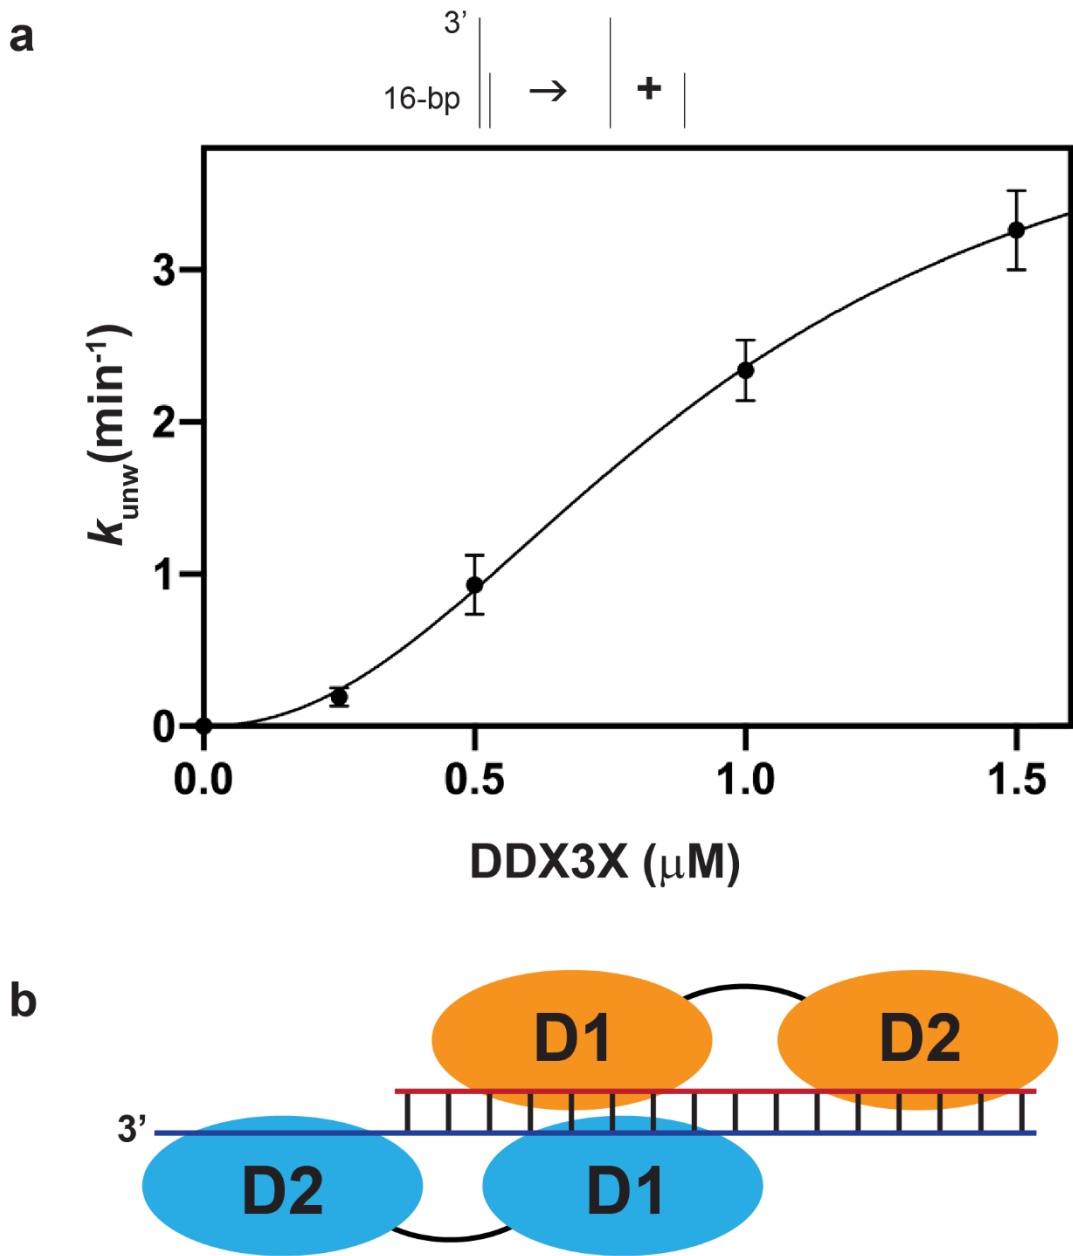

**Supplementary Figure 5 | Hill kinetics for the unwinding activity of human DDX3X. a,** Functional binding isotherm for unwinding the 16-bp dsRNA with a 25-nt 3' overhang (Strand 1: 5'-GCGUCUUUACGGUGCUUAAAACAAAACAAAACAAAACAAA-3'. Strand 2: 5'-AGCACCGUAAAGACGC-3'). Reactions contain 1 nM dsRNA with strand 2 labelled with biotin. Solid line is the best fits to the Hill equation ( $k_{\text{unw}}^{\text{max}} = 4.5 \pm 0.7 \text{ min}^{-1}$ ,  $K_{1/2} = 950 \pm 150 \text{ nM}$ ,  $H = 2.1 \pm 0.3$ ). Error bars represent 1 SD. Source data are provided as a Source Data file. **b,** Schematic representation for the binding of the 16-bp dsRNA with 3' overhang by two D1D2 cores of DDX3X.

**Supplementary Table 1. Data-collection and scattering-derived parameters**

---

|                                       |                                        |
|---------------------------------------|----------------------------------------|
| Data-collection Parameters            |                                        |
| Beam line                             | 12-ID-B (Advanced Photon Source)       |
| Wavelength (Å)                        | 0.8856                                 |
| Detector                              | Pilatus 1M (SAXS), Pilatus 100K (WAXS) |
| $q$ range (Å <sup>-1</sup> )          | 0.006-2.8                              |
| Exposure time (s)                     | 2                                      |
| Concentration range (mg/ml)           | 1-4                                    |
| Temperature                           | 300                                    |
| Structural Parameters                 |                                        |
| $I(0)$ from Guinier fitting           | 0.309 ± 0.003                          |
| $R_g$ from Guinier fitting (Å)        | 33.8 ± 0.3                             |
| $I(0)$ from GNOM                      | 0.292 ± 0.004                          |
| $R_g$ from GNOM (Å)                   | 33.8 ± 0.3                             |
| $D_{\max}$ (Å)                        | 105 ± 5                                |
| <sup>a</sup> MW <sup>pred</sup> (kDa) | 124                                    |
| <sup>b</sup> MW <sup>saxs</sup> (kDa) | 120                                    |
| Fit $\chi^2$ value                    | 1.72                                   |
| Software Employed                     |                                        |
| Primary Data Processing               | Igor Pro                               |
| PDDF                                  | GNOM                                   |
| Ab initio Shape Analysis              | DAMMIN                                 |
| SAXS Profile Computation              | CRYSOL                                 |
| Superposition and averaging           | SUPCOMB/DAMAVR                         |
| Molecular Visualization               | PyMol                                  |

---

<sup>a</sup> The MW<sup>pred</sup> was calculated from the primary sequence.

<sup>b</sup> The MW<sup>saxs</sup> was calculated using the web portal “SAXS MoW”.
